# Supplementary material for: Assessment of Two Restraint Potentials for Coarse-Grained Chemical-Cross-Link-Assisted Modeling of Protein Structures
Source: PubMed Central journal article supplement (PMC10900291; doi:10.1021/acs.jcim.3c01890), 2024-02-12
Supplement: ci3c01890_si_001.pdf [file ci3c01890_si_001.pdf]

# Supporting Information

## Assessment of two restraint potentials for coarse-grained chemical-cross-link-assisted modeling of protein structures

Mateusz Leśniewski,<sup>†</sup> Maciej Pyrka,<sup>†,‡</sup> Cezary Czaplewski,<sup>†</sup> Nguyen Truong Co,<sup>†</sup>  
Yida Jiang,<sup>¶</sup> Zhou Gong,<sup>§</sup> Chun Tang,<sup>¶</sup> and Adam Liwo<sup>\*,†</sup>

<sup>†</sup>*Faculty of Chemistry, University of Gdańsk, Fahrenheit Union of Universities, ul. Wita  
Stwosza 63, 80-308 Gdańsk, Poland*

<sup>‡</sup>*Department of Physics and Biophysics, University of Warmia and Mazury, ul.  
Oczapowskiego 4, 10-719 Olsztyn, Poland*

<sup>¶</sup>*College of Chemistry and Molecular Engineering & Center for Quantitative Biology &  
PKU-Tsinghua Center for Life Sciences & Beijing National Laboratory for Molecular  
Sciences, Peking University, Beijing 100871 China*

<sup>§</sup>*Innovation Academy of Precision Measurement Science and Technology, Chinese Academy  
of Sciences, 30 W. Xiao Hong Shan, Wuhan 430071 China*

E-mail: adam.liwo@ug.edu.pl

Phone: +48 58 5235124. Fax: +48 58 5235012

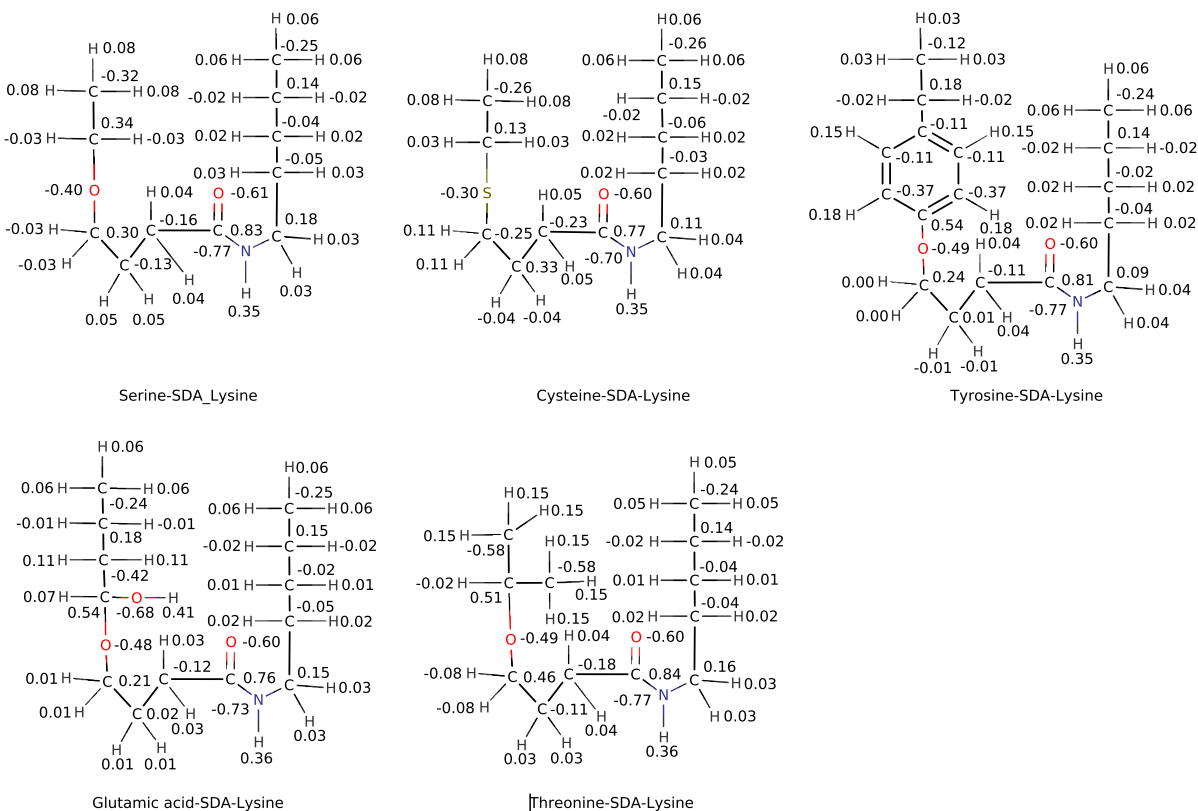

Figure S1: Charges on the atoms (electron charge units) of the model compounds selected for the determination of MD-based X-SDA-Lys potentials of mean force by all-atom MD simulations. The charges were determined by fitting to the molecular electrostatic potential calculated by the RHF 6-31G\* *ab initio* method.

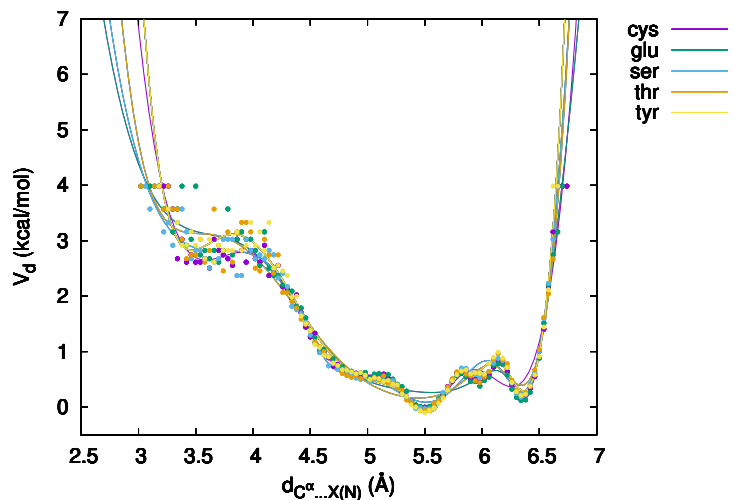

A

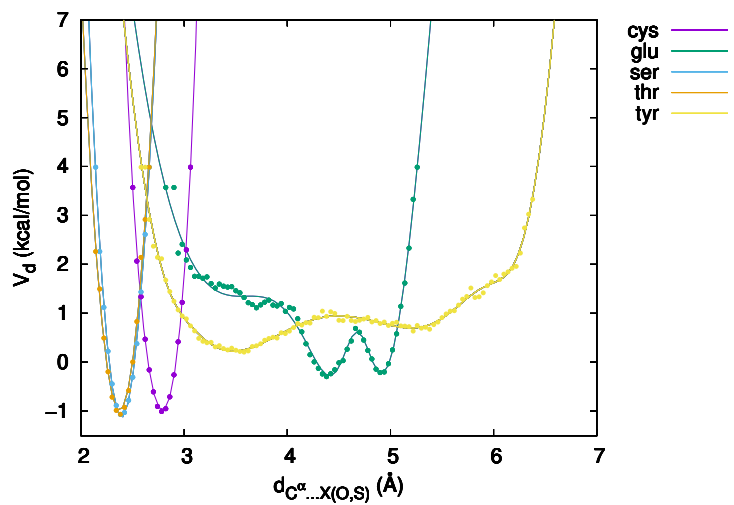

B

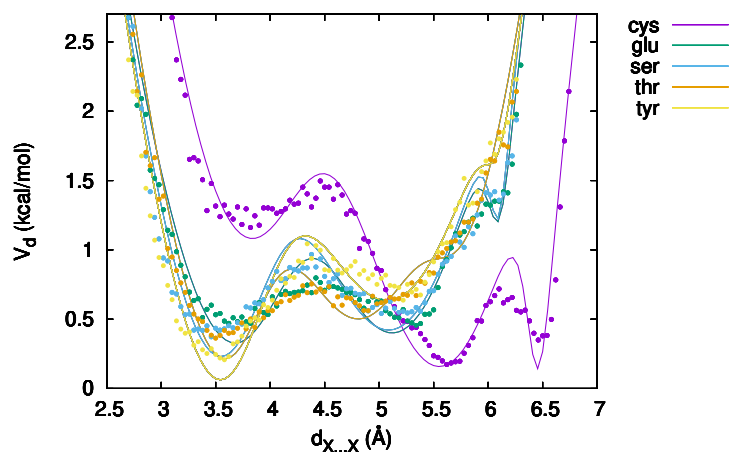

C

Figure S2: Potentials of mean force (filled circles) and fitted analytical expressions (lines; eq 4 of the main text) of the  $C^\alpha \dots X(N)$  (A) and  $X(O) \dots C^\alpha$  (B) and  $X(N) \dots X(O)$  (C) virtual-bond lengths for the Z-SDA-Lys cross-link systems, where Z denotes the amino acid residue that binds to the photoactive site of SDA, X(O) denotes the photoactive site, and X(N) denotes the lysine-binding site of the SDA.

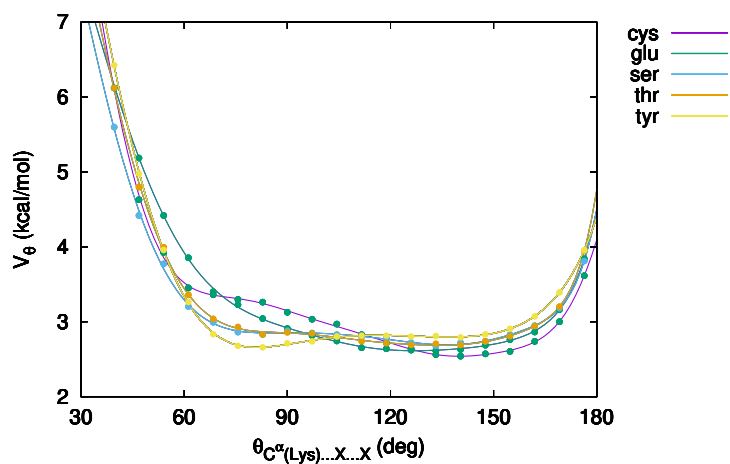

A

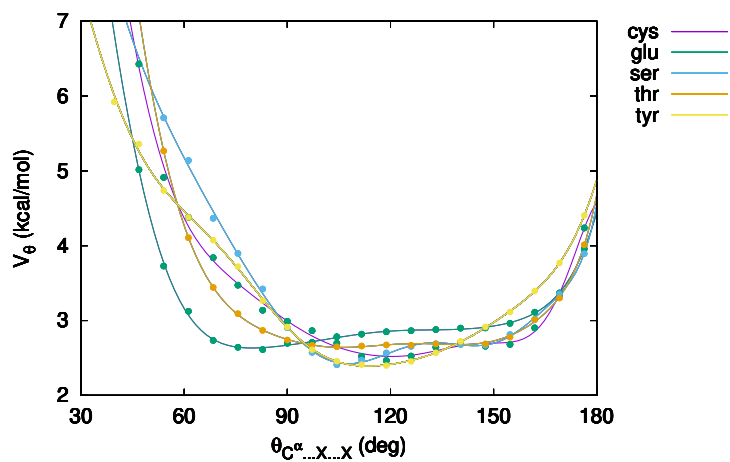

B

Figure S3: Potentials of mean force (filled circles) and fitted analytical expressions (lines; eq 5 of the main text) of the  $C^\alpha \cdots X(N) \cdots X(O)$  (A) and  $X(N) \cdots X(O) \cdots C^\alpha$  (B) virtual-bond angles for the Z-SDA-Lys cross-link systems, where Z denotes the aminoacid residue that binds to the photoactive site of SDA, X(O) denotes the photoactive site, and X(N) denotes the lysine-binding site of the SDA.

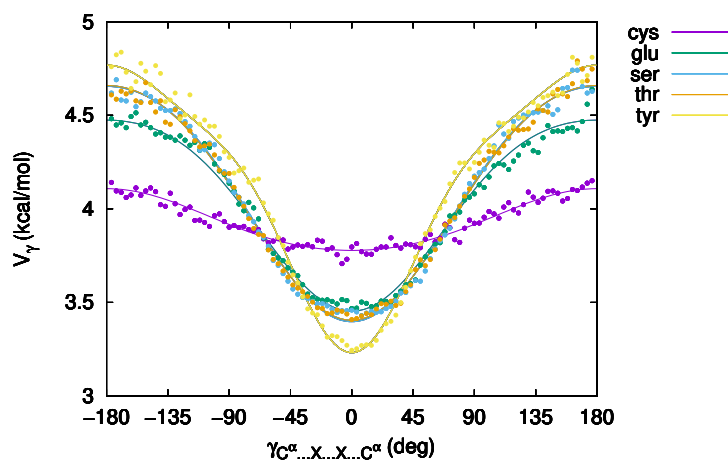

Figure S4: Potentials of mean force (filled circles) and fitted analytical expressions (lines; eq 6 of the main text) of the  $C^\alpha \cdots X(N) \cdots X(O) \cdots C^\alpha$  virtual-bond-dihedral angles averaged over the adjacent virtual-bond-angles  $\theta$  for the Z-SDA-Lys cross-link systems, where Z denotes the aminoacid residue that binds to the photoactive site of SDA, X(O) denotes the photoactive site, and X(N) denotes the lysine-binding site of the SDA.

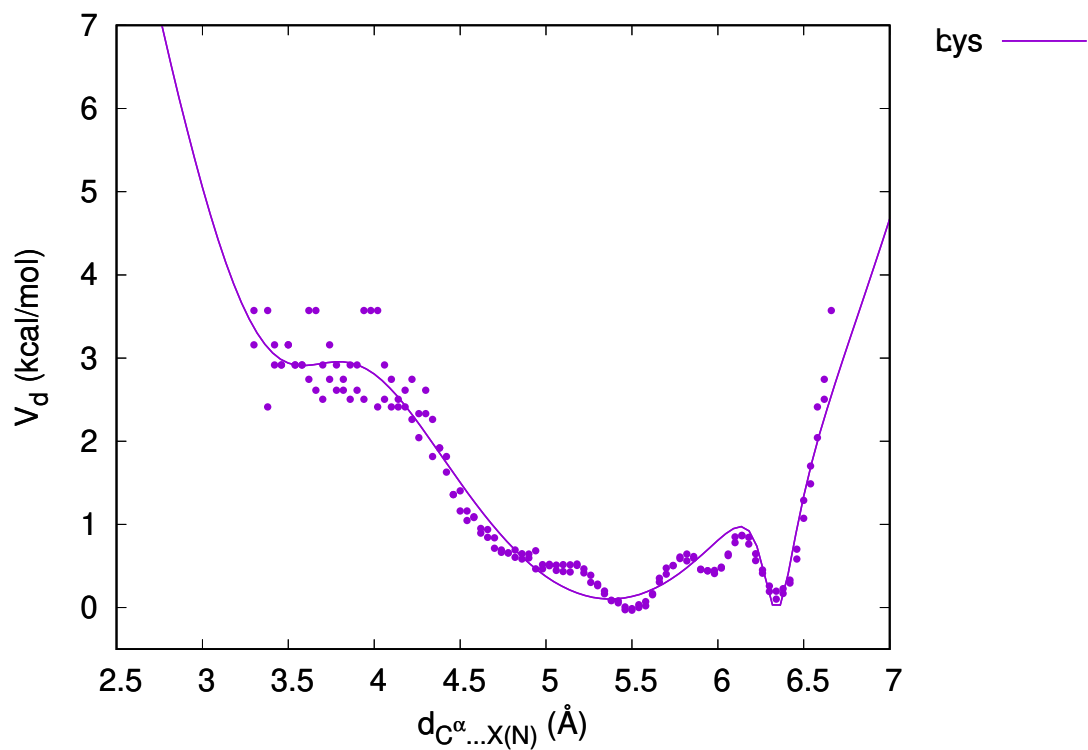

A

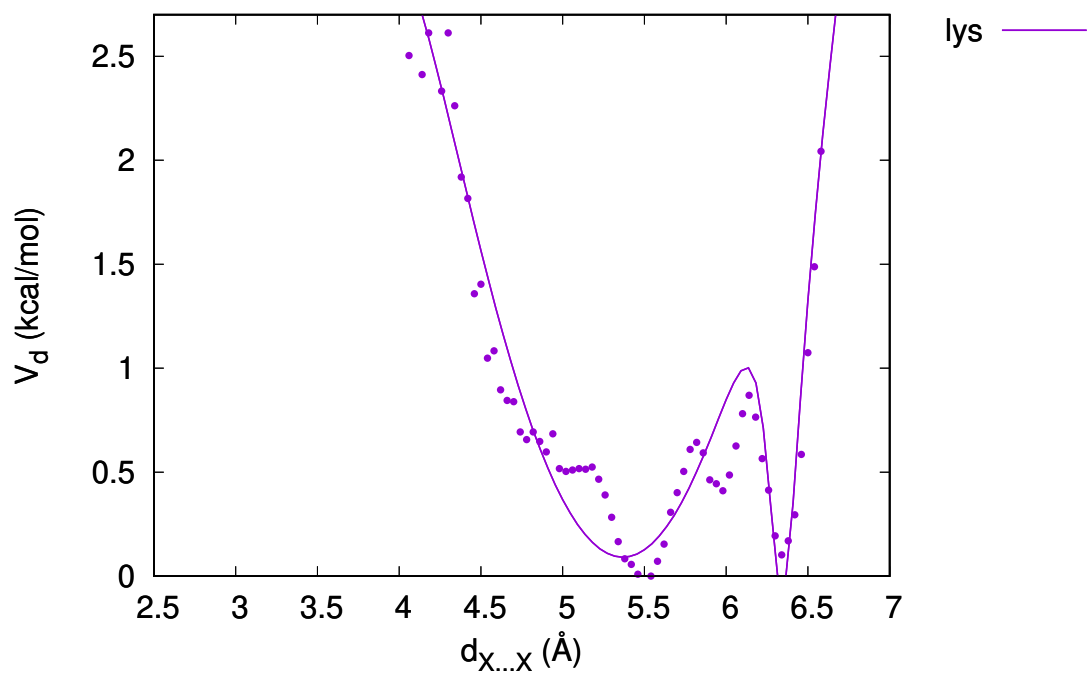

A

Figure S5: Potentials of mean force (filled circles) and fitted analytical expressions (lines; eq 4 of the main text) of the  $C^\alpha \dots X$  (A) virtual-bond and  $X \dots X$  (B) virtual-bond lengths for the Lys-DSA-Lys cross-link system, where X denotes a lysine-binding site of DSA.

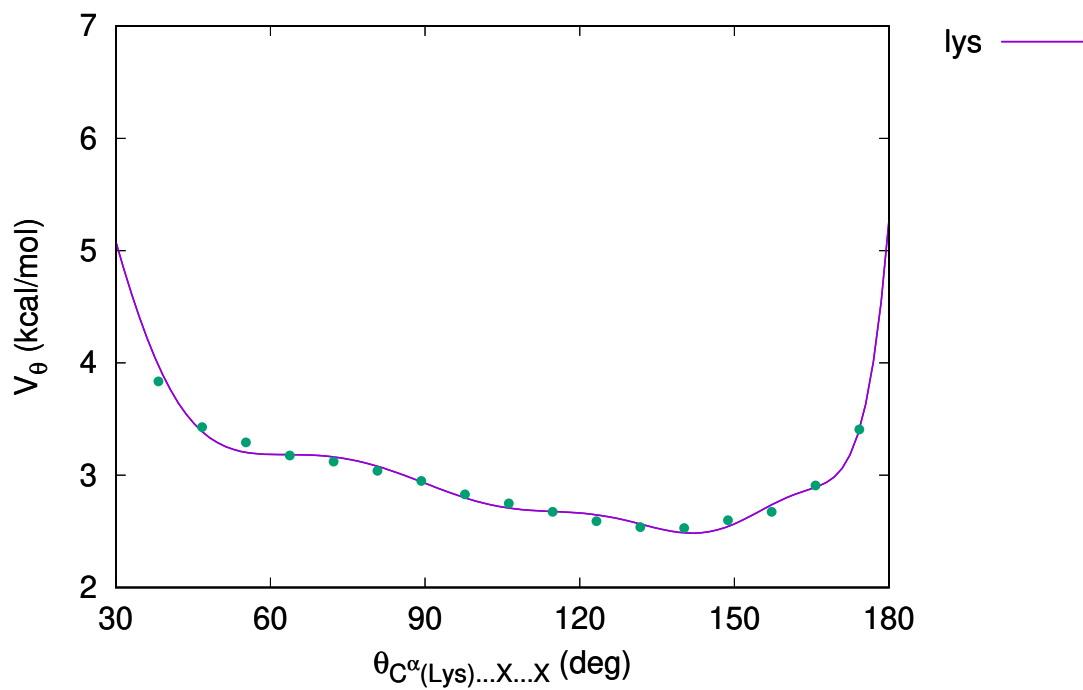

Figure S6: Potential of mean force (filled circles) and fitted analytical expressions (lines; eq 5 of the main text) of the  $C^\alpha \cdots X \cdots X$  and  $X \cdots X \cdots C^\alpha$  virtual-bond angles for the Lys-DNA-Lys cross-link system, where X denotes the lysine-binding site of DNA.

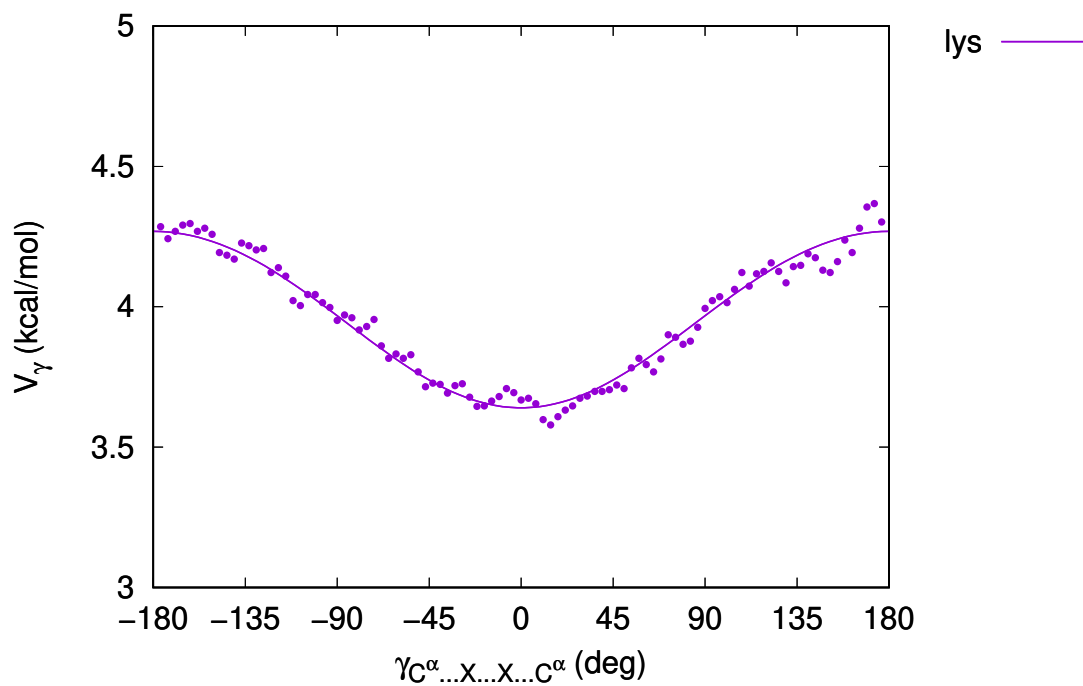

Figure S7: Potential of mean force (filled circles) and the fitted analytical expression (line; eq 6 of the main text) of the  $C^{\alpha}\dots X\dots X\dots C^{\alpha}$  virtual-bond-dihedral angles averaged over the adjacent virtual-bond-angles  $\theta$  for the Lys-DNA-Lys cross-link system.



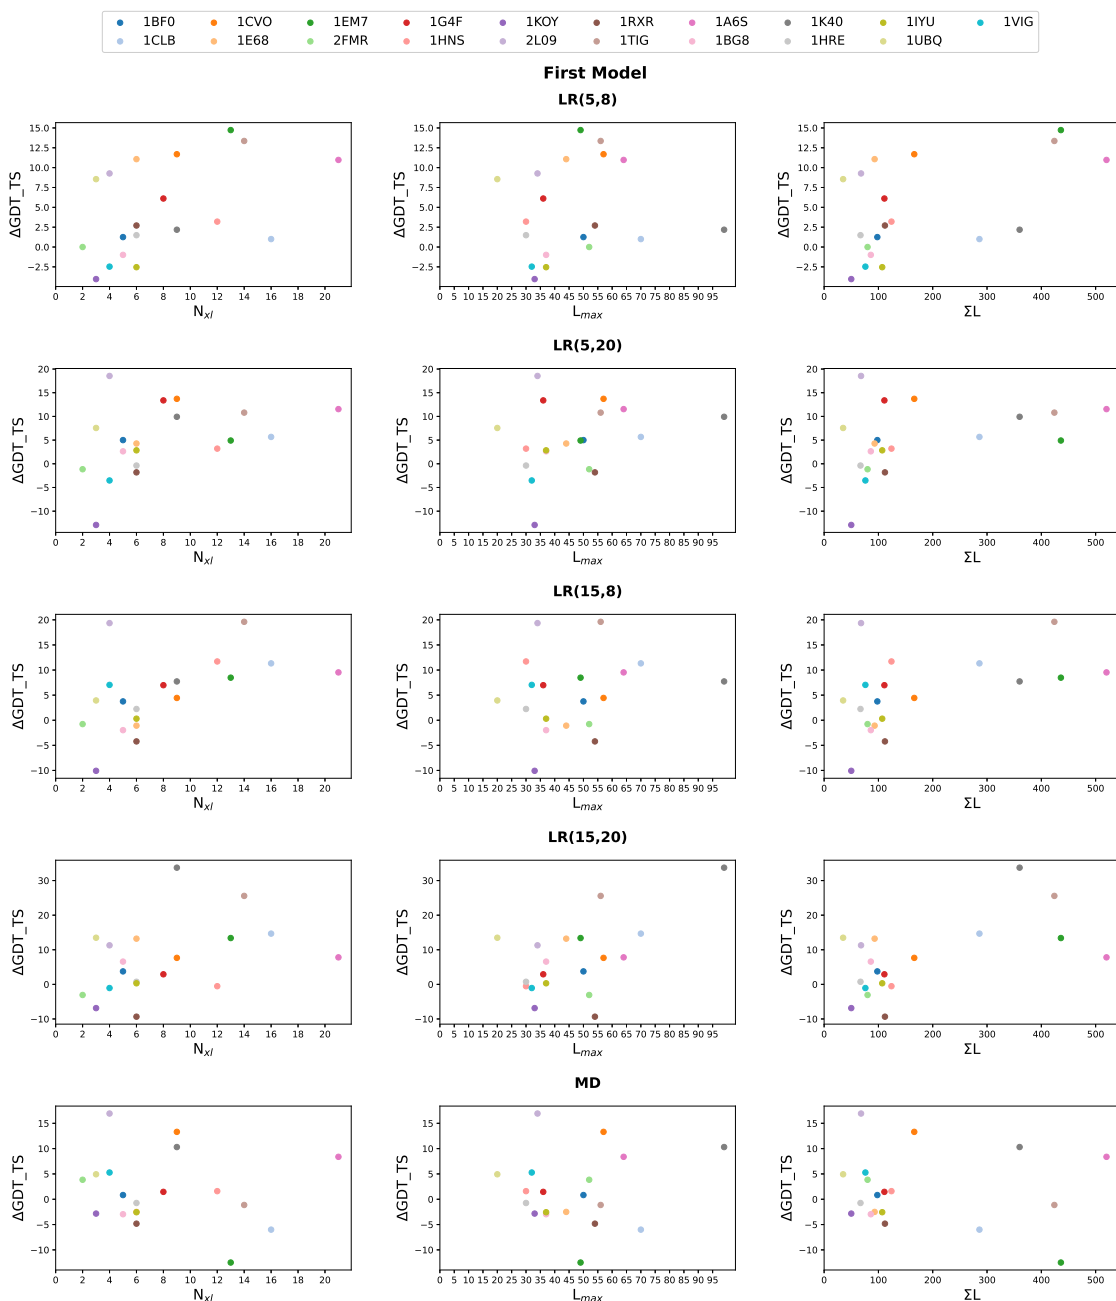

Figure S8: Relationship between the number of cross links ( $N_{Xl}$ , left panels), the topological length of the longest cross-link ( $L_{max}$ , defined as the number of residues in the loop bridged by a cross-link, middle panels) and the sum of cross-link topological lengths ( $\Sigma L$ , right panels) and the difference between the GDT\_TS of models obtained with Lorentz-type cross-link restraints (eq 8 of the main text) for different restraint types (indicated in the respective panels) and the first models obtained from simulations. LR( $\sigma, A$ ) denotes Lorentz-like potentials, with  $\sigma$  and  $A$  being the wall thickness and well depth, respectively (eq 8) of the main text, and MD denotes MD-based potentials (eqs 3 – 6) of the main text.

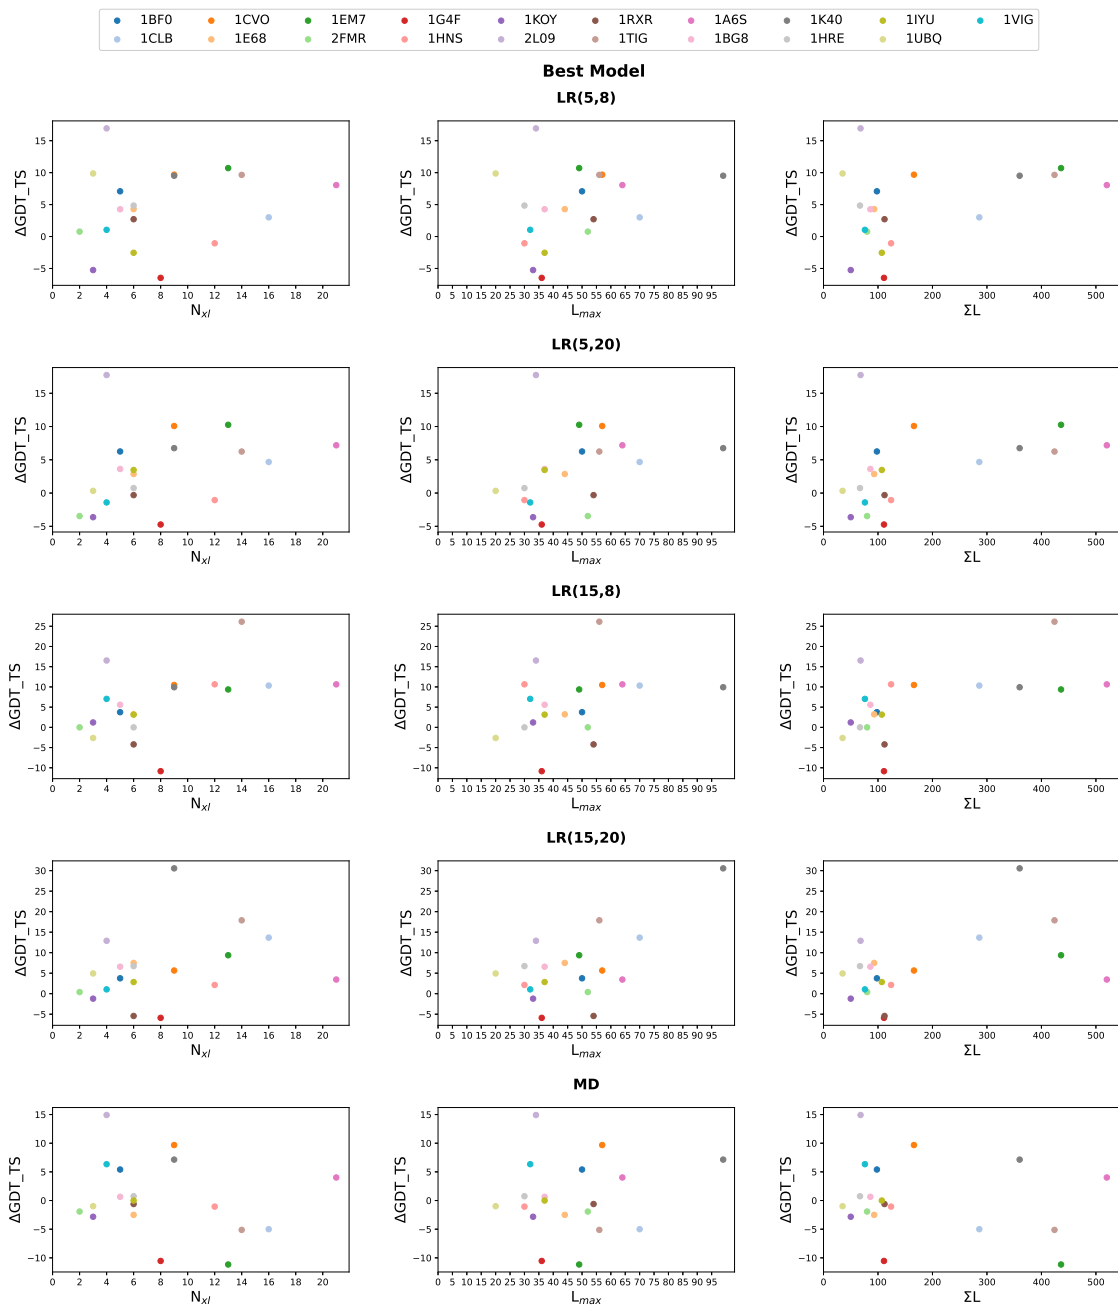

Figure S9: Relationship between the number of cross links ( $N_{XL}$ , left panels), the topological length of the longest cross-link ( $L_{max}$ , defined as the number of residues in the loop bridged by a cross-link, middle panels) and the sum of cross-link topological lengths ( $\Sigma L$ , right panels) and the difference between the GDT\_TS of models obtained with Lorentz-type cross-link restraints (eq 8 of the main text) for different restraint types (indicated in the respective panels) and the best models obtained from simulations. LR( $\sigma, A$ ) denotes Lorentz-like potentials, with  $\sigma$  and  $A$  being the wall thickness and well depth, respectively (eq 8) of the main text, and MD denotes MD-based potentials (eqs 3 – 6) of the main text.

Table S1: Parameters of the expressions for the cross-link virtual-bond potentials (eq 4 of the main text).

| Link type                                                             | $N_d$ | $a_1$<br>[ $\frac{\text{kcal}}{\text{mol}}$ ] | $k_1$<br>[ $\frac{\text{kcal}}{\text{mol} \times \text{\AA}^2}$ ] | $d_1^o$<br>[ $\text{\AA}$ ] | $a_2$<br>[ $\frac{\text{kcal}}{\text{mol}}$ ] | $k_2$<br>[ $\frac{\text{kcal}}{\text{mol} \times \text{\AA}^2}$ ] | $d_2^o$<br>[ $\text{\AA}$ ] | $a_3$<br>[ $\frac{\text{kcal}}{\text{mol}}$ ] | $k_3$<br>[ $\frac{\text{kcal}}{\text{mol} \times \text{\AA}^2}$ ] | $d_3^o$<br>[ $\text{\AA}$ ] | $a_4$<br>[ $\frac{\text{kcal}}{\text{mol}}$ ] | $k_4$<br>[ $\frac{\text{kcal}}{\text{mol} \times \text{\AA}^2}$ ] | $d_4^o$<br>[ $\text{\AA}$ ] | $a_5$<br>[ $\frac{\text{kcal}}{\text{mol}}$ ] | $k_5$<br>[ $\frac{\text{kcal}}{\text{mol} \times \text{\AA}^2}$ ] | $d_5^o$<br>[ $\text{\AA}$ ] |
|-----------------------------------------------------------------------|-------|-----------------------------------------------|-------------------------------------------------------------------|-----------------------------|-----------------------------------------------|-------------------------------------------------------------------|-----------------------------|-----------------------------------------------|-------------------------------------------------------------------|-----------------------------|-----------------------------------------------|-------------------------------------------------------------------|-----------------------------|-----------------------------------------------|-------------------------------------------------------------------|-----------------------------|
| $C^\alpha \dots X$ and $Y \dots C^\alpha$ virtual bonds. <sup>a</sup> |       |                                               |                                                                   |                             |                                               |                                                                   |                             |                                               |                                                                   |                             |                                               |                                                                   |                             |                                               |                                                                   |                             |
| K-DSA-K                                                               | 3     | 4.878                                         | 23.951                                                            | 3.421                       | 0.118                                         | 3.677                                                             | 5.386                       | 0.026                                         | 248.893                                                           | 6.342                       |                                               |                                                                   |                             |                                               |                                                                   |                             |
| C-SDA-K                                                               | 1     | -1.062                                        | 119.221                                                           | 2.778                       |                                               |                                                                   |                             |                                               |                                                                   |                             |                                               |                                                                   |                             |                                               |                                                                   |                             |
|                                                                       | 4     | 0.528                                         | 4.170                                                             | 3.378                       | 0.362                                         | 7.505                                                             | 4.827                       | 0.130                                         | 8.000                                                             | 6.295                       | -0.008                                        | 18.528                                                            | 5.501                       |                                               |                                                                   |                             |
| E-SDA-K                                                               | 4     | 0.087                                         | 0.549                                                             | 3.301                       | -0.637                                        | 88.906                                                            | 4.403                       | 1.424                                         | 0.954                                                             | 11.229                      | -0.308                                        | 95.773                                                            | 4.910                       |                                               |                                                                   |                             |
|                                                                       | 4     | 1.416                                         | 4.462                                                             | 3.160                       | 1.955                                         | 13.188                                                            | 4.988                       | 0.450                                         | 328.066                                                           | 6.365                       | 0.076                                         | 0.947                                                             | 5.695                       |                                               |                                                                   |                             |
| S-SDA-K                                                               | 1     | -1.120                                        | 149.222                                                           | 2.397                       |                                               |                                                                   |                             |                                               |                                                                   |                             |                                               |                                                                   |                             |                                               |                                                                   |                             |
|                                                                       | 4     | 1.537                                         | 5.488                                                             | 3.242                       | 3.728                                         | 131.108                                                           | 4.717                       | 0.885                                         | 190.212                                                           | 6.359                       | 0.009                                         | 0.846                                                             | 5.519                       |                                               |                                                                   |                             |
| T-SDA-K                                                               | 1     | -0.994                                        | 125.743                                                           | 2.372                       |                                               |                                                                   |                             |                                               |                                                                   |                             |                                               |                                                                   |                             |                                               |                                                                   |                             |
|                                                                       | 5     | 0.047                                         | 0.338                                                             | 3.100                       | 0.300                                         | 1.067                                                             | 5.385                       | 0.584                                         | 10.368                                                            | 5.499                       | 1.462                                         | 109.254                                                           | 6.366                       | 1.463                                         | 109.254                                                           | 6.366                       |
| Y-SDA-K                                                               | 3     | 0.063                                         | 8.899                                                             | 3.543                       | 0.677                                         | 3.991                                                             | 5.085                       | 5.352                                         | 338.915                                                           | 6.078                       |                                               |                                                                   |                             |                                               |                                                                   |                             |
|                                                                       | 5     | 0.013                                         | 0.173                                                             | 3.288                       | 0.099                                         | 1.008                                                             | 4.960                       | -0.834                                        | 267.420                                                           | 5.528                       | 0.345                                         | 73.545                                                            | 6.378                       | 3.052                                         | 197.621                                                           | 5.946                       |
| $Y \dots X$ virtual bond                                              |       |                                               |                                                                   |                             |                                               |                                                                   |                             |                                               |                                                                   |                             |                                               |                                                                   |                             |                                               |                                                                   |                             |
| K-DSA-K                                                               | 3     | 4.024                                         | 2.819                                                             | 4.420                       | 0.527                                         | 3.578                                                             | 7.585                       | 1.113                                         | 2.486                                                             | 6.211                       |                                               |                                                                   |                             |                                               |                                                                   |                             |
| C-SDA-K                                                               | 3     | 1.254                                         | 8.051                                                             | 3.808                       | 0.161                                         | 5.238                                                             | 5.551                       | 0.152                                         | 133.65                                                            | 6.453                       |                                               |                                                                   |                             |                                               |                                                                   |                             |
| E-SDA-K                                                               | 3     | 0.348                                         | 6.420                                                             | 3.676                       | 0.426                                         | 5.009                                                             | 5.127                       | 2.406                                         | 344.20                                                            | 6.093                       |                                               |                                                                   |                             |                                               |                                                                   |                             |
| S-SDA-K                                                               | 3     | 0.240                                         | 8.604                                                             | 3.546                       | 0.440                                         | 4.373                                                             | 5.091                       | 2.500                                         | 532.23                                                            | 6.090                       |                                               |                                                                   |                             |                                               |                                                                   |                             |
| T-SDA-K                                                               | 3     | 0.225                                         | 9.830                                                             | 3.583                       | 0.566                                         | 5.286                                                             | 4.810                       | 1.681                                         | 21.602                                                            | 5.702                       |                                               |                                                                   |                             |                                               |                                                                   |                             |
| Y-SDA-K                                                               | 3     | 0.063                                         | 8.899                                                             | 3.543                       | 0.677                                         | 3.992                                                             | 5.085                       | 5.352                                         | 338.92                                                            | 6.078                       |                                               |                                                                   |                             |                                               |                                                                   |                             |

<sup>a</sup>Y denotes the lysine-binding site of DSA or SDA and X the photoactive site of SDA. For SDA, the upper rows contain the parameters of the  $C^\alpha \dots Y$  and the lower rows those of the  $Y \dots C^\alpha$  virtual bonds. There is only one row for DSA because this is a symmetric homobifunctional cross-linker.

Table S2: Parameters of the expressions for the cross-link virtual-bond-angle potentials (eq 5 of the main text).<sup>a</sup>

| Link type | $N_\theta$ | $a_1$                                | $b_1$                                | $a_2$                                | $b_2$                                | $a_3$                                | $b_3$                                | $a_4$                                | $b_4$                                | $a_5$                                | $b_5$                                | $a_6$                                | $b_6$                                |
|-----------|------------|--------------------------------------|--------------------------------------|--------------------------------------|--------------------------------------|--------------------------------------|--------------------------------------|--------------------------------------|--------------------------------------|--------------------------------------|--------------------------------------|--------------------------------------|--------------------------------------|
|           |            | $\frac{[\text{kcal}]}{[\text{mol}]}$ | $\frac{[\text{kcal}]}{[\text{mol}]}$ | $\frac{[\text{kcal}]}{[\text{mol}]}$ | $\frac{[\text{kcal}]}{[\text{mol}]}$ | $\frac{[\text{kcal}]}{[\text{mol}]}$ | $\frac{[\text{kcal}]}{[\text{mol}]}$ | $\frac{[\text{kcal}]}{[\text{mol}]}$ | $\frac{[\text{kcal}]}{[\text{mol}]}$ | $\frac{[\text{kcal}]}{[\text{mol}]}$ | $\frac{[\text{kcal}]}{[\text{mol}]}$ | $\frac{[\text{kcal}]}{[\text{mol}]}$ | $\frac{[\text{kcal}]}{[\text{mol}]}$ |
| K-DSA-K   | 6          | 1.023                                | -31.686                              | -218.643                             | 545.730                              | -3.291                               | -477.347                             | 71.206                               | 161.151                              | 5.151                                | -477.221                             | 152.706                              | 279.417                              |
| C-SDA-K   | 6          | 1.780                                | 102.553                              | -1.860                               | -1.366                               | 8.450                                | -91.394                              | -3.355                               | -238.915                             | 214.373                              | -88.390                              | 302.545                              | -186.417                             |
|           | 6          | 0.850                                | 9.608                                | -2.119                               | 18.194                               | 7.721                                | -20.336                              | -8.430                               | -18.017                              | 14.114                               | -18.918                              | 90.311                               | -58.989                              |
| E-SDA-K   | 6          | -0.337                               | -14.236                              | 0.840                                | 25.718                               | 6.814                                | -2.788                               | -8.860                               | 32.247                               | -25.302                              | 3.426                                | 11.383                               | -13.278                              |
|           | 6          | 0.830                                | -42.955                              | 1.451                                | -12.734                              | 105.396                              | -86.204                              | 32.928                               | 1.674                                | 15.440                               | 27.162                               | -67.350                              | 33.616                               |
| S-SDA-K   | 6          | 3.112                                | -127.786                             | -3.590                               | 54.746                               | 6.148                                | 80.283                               | -13.815                              | 282.097                              | -227.747                             | 97.139                               | -307.085                             | 169.366                              |
|           | 6          | -0.016                               | -54.971                              | 1.464                                | 34.646                               | 2.888                                | 26.129                               | -13.745                              | 136.980                              | -118.263                             | 34.646                               | -85.007                              | 45.218                               |
| T-SDA-K   | 6          | 0.782                                | -53.511                              | 0.964                                | 36.213                               | 8.990                                | 29.679                               | -13.050                              | 130.497                              | -108.275                             | 37.060                               | -97.629                              | 51.122                               |
|           | 6          | 0.130                                | -69.682                              | 1.565                                | 38.874                               | 3.271                                | 37.517                               | -16.401                              | 175.497                              | -149.812                             | 47.848                               | -128.493                             | 71.200                               |
| Y-SDA-K   | 6          | 2.732                                | -8.359                               | -4.157                               | 10.627                               | -4.036                               | -6.823                               | 21.681                               | -7.694                               | 5.119                                | 48.559                               | -11.901                              | -36.468                              |
|           | 6          | -0.420                               | -7.854                               | -19.290                              | 36.958                               | 3.111                                | -25.041                              | 27.986                               | 9.271                                | 2.615                                | -14.713                              | -2.051                               | 1.026                                |

12

<sup>a</sup>For the Z-SDA-Lys systems, the upper rows are for the  $C^\alpha \cdots X \cdots Y$  and the lower rows for the  $Y \cdots C^\alpha \cdots X$  virtual-bond angles, where X denotes the amino-acid residue binding to the photoactive site of SDA and Y denotes the lysine-binding site of SDA. For DSA, which is a symmetric homobifunctional cross-linker, both binding sites are equivalent and, consequently, there is only one set of parameters.

Table S3: Parameters of the expressions for the cross-link virtual-bond-dihedral-angle potentials (eq 6 of the main text).

| Link type | $N_\gamma$ | $V_1$                                         | $V_2$                                         | $V_3$                                         |
|-----------|------------|-----------------------------------------------|-----------------------------------------------|-----------------------------------------------|
|           |            | $\left[\frac{\text{kcal}}{\text{mol}}\right]$ | $\left[\frac{\text{kcal}}{\text{mol}}\right]$ | $\left[\frac{\text{kcal}}{\text{mol}}\right]$ |
| K-DSA-K   | 2          | -0.314                                        | -0.007                                        |                                               |
| C-SDA-K   | 2          | -0.165                                        | 0.013                                         |                                               |
| E-SDA-K   | 2          | -0.511                                        | -0.069                                        |                                               |
| S-SDA-K   | 2          | -0.629                                        | -0.059                                        |                                               |
| T-SDA-K   | 2          | -0.627                                        | -0.051                                        |                                               |
| Y-SDA-K   | 3          | -0.697                                        | -0.148                                        | -0.071                                        |

Table S4: Positions of the synthetic short (SDA- and DSA-type) cross-links of the first benchmark set used in this work to evaluate various cross-linking potentials.

| ID   | N <sup>a</sup> | N <sup>b</sup> <sub>start</sub> | Type             | N <sup>c</sup> <sub>link</sub> | Cross-link list <sup>d</sup>                                                                                                                             |
|------|----------------|---------------------------------|------------------|--------------------------------|----------------------------------------------------------------------------------------------------------------------------------------------------------|
| 1BF0 | 60             | 1                               | $\beta$          | 5 (4)                          | Y6–K56, C7–K26, K18–S38, K26–C32, E52–K55                                                                                                                |
| 1CLB | 75             | 1                               | $\alpha$         | 16(11)                         | K1–E4, K1–E5, K12–E35, K16–E27, K25–E60, E51–K55, E52–K55, K55–E65, K16–S24, Y13–K16, K1–K71*, K16–K25*, K25–K55*, K29–K41*, K41–K71*, K41–K72*          |
| 1CVO | 62             | 1                               | $\beta$          | 9 (7)                          | K2–T14, K2–C15, C3–K13, C3–K60, C15–K19, K24–Y53, T26–K37, T26–K52, S48–K52                                                                              |
| 1E68 | 70             | 1                               | $\alpha$         | 6 (4)                          | K14–K58, T20–K46, E43–K51, K50–K58*, K54–K58*, K55–K58*                                                                                                  |
| 1EM7 | 56             | 1                               | $\alpha + \beta$ | 13(12)                         | T1–K50, T2–K50, Y3–K50, K4–E15, K4–T17, K4–T49, K4–T51, K10–E56, K13–E56, T17–K50, Y45–K50, K4–K50*, K10–K13*                                            |
| 2FMR | 65             | 1                               | $\alpha + \beta$ | 2 (2)                          | Q7–K59, K31–K59*                                                                                                                                         |
| 1GF4 | 86             | 1                               | $\alpha + \beta$ | 7 (6)                          | T13–K22, E25–K28, K42–C48, K42–S49, K42–Y50, C48–K84, S49–K84                                                                                            |
| 1HNS | 47             | 90                              | $\alpha + \beta$ | 12(10)                         | K95–T107, K95–T109, S97–K127, T98–K106, T98–K120, E101–K106, E104–K106, T114–K119, K120–S128, E124–K127, K120–K127*, K127–K135*                          |
| 1KOY | 62             | 239                             | $\alpha$         | 3 (3)                          | K248–S254, K248–K281*, K269–K280*                                                                                                                        |
| 2L09 | 62             | 1                               | $\alpha$         | 3 (3)                          | K12–E46, K10–K25*, K14–K25*                                                                                                                              |
| 1RXR | 84             | 130                             | $\alpha$         | 6 (3)                          | C138–K181, K145–Y150, Y147–K201, E153–K156, T162–K165, C190–K194                                                                                         |
| 1TIG | 90             | 83                              | $\alpha + \beta$ | 14(13)                         | E87–K117, S91–K123, T93–K123, K115–E151, K117–T152, K86–K102*, K86–108*, K86–K112*, K86–K115*, K86–K117*, K112–K115*, K112–K168*, K115–K168*, K130–K155* |

<sup>a</sup>Number of residues in the PDB structure.

<sup>b</sup>The number of the first residue in the PDB structure.

<sup>c</sup>Number of synthetic cross-links, the long-range cross-links (bridging the residues with indices differing by at least 5) in parentheses.

<sup>d</sup>Residue numbering follows that of the PDB structure. Asterisks mark the DSA-type cross-links, the SDA-type cross-links are unmarked.

Table S5: Positions of the synthetic longer (BS<sup>3</sup>) Lys-Lys cross-links for the proteins of the benchmark set of ref 1.

| ID   | N <sup>a</sup> | N <sup>b</sup> <sub>start</sub> | Type             | N <sup>c</sup> <sub>link</sub> | Cross-link list <sup>d</sup>                                                                                                                                                              |
|------|----------------|---------------------------------|------------------|--------------------------------|-------------------------------------------------------------------------------------------------------------------------------------------------------------------------------------------|
| 1A6S | 86             | 1                               | $\alpha$         | 21 (20)                        | K6–K13, K6–K18, K13–K18, K13–K23, K13–K24, K13–K67, K13–K72, K18–K23, K18–K24, K18–K82, K23–K24, K23–K35, K23–K67, K23–K72, K24–K35, K24–K67, K24–K72, K35–K67, K35–K72, K67–K72, K72–K82 |
| 1BG8 | 76             | 10                              | $\alpha$         | 5 (4)                          | K42–K97, K42–K79, K75–K79, K77–K84, K79–K84                                                                                                                                               |
| 1K40 | 126            | 921                             | $\alpha$         | 9 (9)                          | K933–K941, K933–K955, K933–K1032, K941–K955, K941–K1000, K941–K1017, K955–K1002, K1000–K1017, K1000–K1018                                                                                 |
| 1HRE | 67             | 175                             | $\beta$          | 6 (4)                          | K181–K185, K181–K187, K181–K200, K181–K211, K185–K187, K228–K234                                                                                                                          |
| 1IYU | 78             | 1                               | $\beta$          | 6 (5)                          | K21–K53, K21–K58, K39–K62, K48–K53, K58–K62, K58–K64                                                                                                                                      |
| 1UBQ | 76             | 1                               | $\alpha + \beta$ | 3 (2)                          | K6–K11, K11–K33, K29–K33                                                                                                                                                                  |
| 1VIG | 71             | 6                               | $\alpha + \beta$ | 4 (3)                          | K19–K27, K19–K51, K36–K40, K36–K68                                                                                                                                                        |

<sup>a</sup>Number of residues in the PDB structure.

<sup>b</sup>The number of the first residue in the PDB structure.

<sup>c</sup>Number of synthetic cross-links between lysine residues, the long-range cross-links (bridging the residues with indices differing by at least 5) in parentheses.

<sup>d</sup>Residue numbering follows that of the PDB structure.

Table S6: Positions of the experimental cross-links for the four selected repeats of human albumin (1AO6-1, 1AO6-2, 1AO6-3, and 1AO6-6; data from ref 2) and horse myoglobin (2V1H; data from ref 3).

| ID     | N <sup>a</sup> | N <sup>b</sup> <sub>start</sub> | Type     | N <sup>c</sup> <sub>link</sub> | Disulfide bridges (marked SS) and cross-link (marked with the appropriate cross-linking-agent abbreviation) list <sup>d</sup> .                                                                                                                                                                                       |
|--------|----------------|---------------------------------|----------|--------------------------------|-----------------------------------------------------------------------------------------------------------------------------------------------------------------------------------------------------------------------------------------------------------------------------------------------------------------------|
| 1AO6-1 | 101            | 5                               | $\alpha$ | 3<br>5 (5)                     | C53–C62 (SS), C75–C91 (SS), C90–C101 (SS)<br>K12–E57 (DSA), E45–K73 (DSA), E48–K73 (DSA), K93–E100 (DSA), K93–C101 (DSA)                                                                                                                                                                                              |
| 1AO6-2 | 101            | 106                             | $\alpha$ | 3<br>5 (5)                     | C124–C169 (SS), C168–C177 (SS)<br>K137–A161 (DSA), Y138–K162 (DSA), Y148–K199 (DSA), Y150–K199 (DSA), E167–K181 (DSA)                                                                                                                                                                                                 |
| 1AO6-3 | 92             | 208                             | $\alpha$ | 3<br>3 (3)                     | C245–C253 (SS), C265–C279 (SS), C278–C289 (SS)<br>K233–Y263 (DSA), E252–K262 (DSA), K281–K292 (DSA)                                                                                                                                                                                                                   |
| 1AO6-6 | 84             | 499                             | $\alpha$ | 2<br>3 (1)                     | C514–C559 (SS), C558–C567 (SS)<br>K536–T540 (DSA), K538–E542 (DSA), K557–E571 (DSA)                                                                                                                                                                                                                                   |
| 2V1H   | 153            | 1                               | $\alpha$ | 20 (20)                        | G1–K133 (ABAS), K56–K118 (ABAS), G1–G80 (TATA), G1–A130 (TATA), S3–A130 (TATA), T39–I99 (TATA), K45–K98 (TATA), A90–K145 (TATA), G1–K145 (DSA), K87–K147 (DSA), K87–K145 (DSA), K98–K147 (DSA), K42–K98 (DSG), G1–H81 (SDA), V17–K77 (SDA), E18–K77 (SDA), H24–K56 (SDA), Q26–K56 (SDA), E27–K56 (SDA), L29–K42 (SDA) |

<sup>a</sup>Number of residues in the PDB structure.

<sup>b</sup>The number of the first residue in the PDB structure.

<sup>c</sup>Number of cross-links, the long-range cross-links (bridging the residues with indices differing by at least 5) in parentheses.

<sup>d</sup>The cross-links corresponding to pairs of residues with the C <sup>$\alpha$</sup> -distances greater by more than 10 Å than the maximum cross-link span are in red font and those with C <sup>$\alpha$</sup> -distances greater by 5–10 Å than the maximum cross-link span are in orange font. All other cross-links are in regular font.



Table S7: C<sup>α</sup>-RMSD, TM-score, and GDT\_TS values of the first and best models of the 12 short-link benchmark proteins obtained in the free and restrained simulations.<sup>a</sup>

| ID                            | Model 1              |          |        | Best model           |          |        |
|-------------------------------|----------------------|----------|--------|----------------------|----------|--------|
|                               | C <sup>α</sup> -RMSD | TM-score | GDT_TS | C <sup>α</sup> -RMSD | TM-score | GDT_TS |
| Free simulations              |                      |          |        |                      |          |        |
| 1BF0                          | 10.38                | 0.2540   | 29.17  | 9.73                 | 0.2540   | 29.17  |
| 1CLB                          | 11.09                | 0.2702   | 33.00  | 9.16                 | 0.2875   | 34.00  |
| 1CVO                          | 11.78                | 0.1765   | 21.37  | 9.31                 | 0.1847   | 25.00  |
| 1E68                          | 9.49                 | 0.3510   | 39.29  | 5.41                 | 0.3698   | 46.07  |
| 1EM7                          | 5.25                 | 0.3745   | 54.02  | 4.80                 | 0.4420   | 58.04  |
| 2FMR                          | 11.01                | 0.2182   | 27.69  | 8.36                 | 0.2795   | 33.46  |
| 1G4F                          | 12.07                | 0.2195   | 22.67  | 11.86                | 0.2809   | 28.49  |
| 1HNS                          | 10.57                | 0.2492   | 37.23  | 8.28                 | 0.2696   | 41.49  |
| 1KOY                          | 6.55                 | 0.3008   | 40.73  | 6.73                 | 0.3438   | 41.94  |
| 2L09                          | 12.57                | 0.2350   | 28.23  | 9.51                 | 0.2556   | 31.05  |
| 1RXR                          | 11.95                | 0.2828   | 28.92  | 11.95                | 0.2828   | 28.92  |
| 1TIG                          | 11.67                | 0.2572   | 26.70  | 12.58                | 0.3264   | 34.38  |
| MD-based restraint potentials |                      |          |        |                      |          |        |
| 1BF0                          | 12.16                | 0.2365   | 30.00  | 8.42                 | 0.2748   | 34.58  |
| 1CLB                          | 9.78                 | 0.2334   | 27.00  | 8.68                 | 0.2728   | 29.00  |
| 1CVO                          | 8.25                 | 0.2578   | 34.68  | 8.25                 | 0.2578   | 34.68  |
| 1E68                          | 8.01                 | 0.3206   | 36.79  | 5.22                 | 0.3206   | 43.57  |
| 1EM7                          | 8.44                 | 0.3410   | 41.52  | 7.21                 | 0.3821   | 46.88  |
| 2FMR                          | 10.67                | 0.2548   | 31.54  | 9.43                 | 0.2548   | 31.54  |
| 1G4F                          | 11.26                | 0.2244   | 24.13  | 10.46                | 0.3147   | 31.40  |
| 1HNS                          | 7.03                 | 0.2390   | 38.83  | 6.35                 | 0.2485   | 40.43  |
| 1KOY                          | 8.64                 | 0.2782   | 37.90  | 6.80                 | 0.3412   | 39.11  |

|                                                                              |       |        |       |       |        |       |
|------------------------------------------------------------------------------|-------|--------|-------|-------|--------|-------|
| 2L09                                                                         | 6.64  | 0.3638 | 45.16 | 6.64  | 0.3910 | 45.97 |
| 1RXR                                                                         | 11.38 | 0.2209 | 24.10 | 11.29 | 0.2780 | 28.31 |
| 1TIG                                                                         | 10.01 | 0.2632 | 25.57 | 9.93  | 0.2728 | 29.26 |
| Lorentz-like potential, $\sigma = 5 \text{ \AA}$ , $A = 8 \text{ kcal/mol}$  |       |        |       |       |        |       |
| 1BF0                                                                         | 8.85  | 0.2559 | 30.42 | 8.85  | 0.3062 | 36.25 |
| 1CLB                                                                         | 7.14  | 0.2726 | 34.00 | 7.14  | 0.3320 | 37.00 |
| 1CVO                                                                         | 8.27  | 0.2581 | 33.06 | 7.88  | 0.3192 | 34.68 |
| 1E68                                                                         | 4.10  | 0.4360 | 50.36 | 4.10  | 0.4360 | 50.36 |
| 1EM7                                                                         | 3.15  | 0.5503 | 68.75 | 3.15  | 0.5503 | 68.75 |
| 2FMR                                                                         | 11.29 | 0.2367 | 27.69 | 8.29  | 0.2731 | 34.23 |
| 1G4F                                                                         | 11.92 | 0.2673 | 28.78 | 10.75 | 0.3461 | 35.47 |
| 1HNS                                                                         | 8.54  | 0.2535 | 40.43 | 6.94  | 0.2725 | 40.43 |
| 1KOY                                                                         | 8.96  | 0.2798 | 36.69 | 8.49  | 0.3176 | 36.69 |
| 2L09                                                                         | 8.25  | 0.2943 | 37.50 | 6.06  | 0.4249 | 47.98 |
| 1RXR                                                                         | 12.15 | 0.2983 | 31.63 | 12.15 | 0.2983 | 31.63 |
| 1TIG                                                                         | 8.19  | 0.4297 | 40.06 | 6.68  | 0.4297 | 44.03 |
| Lorentz-like potential, $\sigma = 15 \text{ \AA}$ , $A = 8 \text{ kcal/mol}$ |       |        |       |       |        |       |
| 1BF0                                                                         | 9.17  | 0.2563 | 32.92 | 9.17  | 0.2563 | 32.92 |
| 1CLB                                                                         | 5.94  | 0.3554 | 44.33 | 5.94  | 0.3908 | 44.33 |
| 1CVO                                                                         | 10.40 | 0.1921 | 25.81 | 8.45  | 0.3107 | 35.48 |
| 1E68                                                                         | 6.07  | 0.2903 | 38.21 | 5.97  | 0.4063 | 49.29 |
| 1EM7                                                                         | 3.27  | 0.5016 | 62.50 | 3.25  | 0.5409 | 67.41 |
| 2FMR                                                                         | 11.70 | 0.2091 | 26.92 | 9.38  | 0.2642 | 33.46 |
| 1G4F                                                                         | 11.26 | 0.3000 | 29.65 | 10.74 | 0.3016 | 31.10 |
| 1HNS                                                                         | 6.60  | 0.3294 | 48.94 | 5.82  | 0.3681 | 52.13 |
| 1KOY                                                                         | 10.82 | 0.2533 | 30.65 | 6.38  | 0.3510 | 43.15 |
| 2L09                                                                         | 8.72  | 0.4126 | 47.58 | 8.09  | 0.3809 | 47.58 |

|                                                                               |       |        |       |       |        |       |
|-------------------------------------------------------------------------------|-------|--------|-------|-------|--------|-------|
| 1RXR                                                                          | 10.41 | 0.2282 | 24.70 | 10.41 | 0.2366 | 24.70 |
| 1TIG                                                                          | 8.86  | 0.4646 | 46.31 | 3.28  | 0.6217 | 60.51 |
| Lorentz-like potential, $\sigma = 5 \text{ \AA}$ , $A = 20 \text{ kcal/mol}$  |       |        |       |       |        |       |
| 1BF0                                                                          | 8.78  | 0.2615 | 34.17 | 8.19  | 0.2870 | 35.42 |
| 1CLB                                                                          | 7.79  | 0.3306 | 38.67 | 7.79  | 0.3306 | 38.67 |
| 1CVO                                                                          | 8.69  | 0.2834 | 35.08 | 8.03  | 0.2834 | 35.08 |
| 1E68                                                                          | 5.09  | 0.3346 | 43.57 | 4.76  | 0.4068 | 48.93 |
| 1EM7                                                                          | 3.88  | 0.4339 | 58.93 | 3.02  | 0.5556 | 68.30 |
| 2FMR                                                                          | 10.19 | 0.2137 | 26.54 | 7.68  | 0.2377 | 30.00 |
| 1G4F                                                                          | 9.61  | 0.3650 | 36.05 | 9.61  | 0.3952 | 37.21 |
| 1HNS                                                                          | 7.77  | 0.2748 | 40.43 | 7.77  | 0.2748 | 40.43 |
| 1KOY                                                                          | 10.78 | 0.2154 | 27.82 | 6.98  | 0.3029 | 38.31 |
| 2L09                                                                          | 6.30  | 0.3899 | 46.77 | 5.67  | 0.3899 | 48.79 |
| 1RXR                                                                          | 8.77  | 0.2575 | 27.11 | 8.77  | 0.2802 | 28.61 |
| 1TIG                                                                          | 7.08  | 0.3621 | 37.50 | 6.86  | 0.4015 | 40.62 |
| Lorentz-like potential, $\sigma = 15 \text{ \AA}$ , $A = 20 \text{ kcal/mol}$ |       |        |       |       |        |       |
| 1BF0                                                                          | 7.99  | 0.2657 | 32.92 | 7.99  | 0.2657 | 32.92 |
| 1CLB                                                                          | 4.66  | 0.4402 | 47.67 | 4.65  | 0.4402 | 47.67 |
| 1CVO                                                                          | 8.89  | 0.2388 | 29.03 | 7.58  | 0.2532 | 30.65 |
| 1E68                                                                          | 4.30  | 0.4489 | 52.50 | 4.08  | 0.4517 | 53.57 |
| 1EM7                                                                          | 3.10  | 0.5422 | 67.41 | 3.10  | 0.5410 | 67.41 |
| 2FMR                                                                          | 10.28 | 0.2005 | 24.62 | 7.81  | 0.2834 | 33.85 |
| 1G4F                                                                          | 13.44 | 0.2344 | 25.58 | 8.93  | 0.3712 | 36.05 |
| 1HNS                                                                          | 7.99  | 0.2474 | 36.70 | 7.41  | 0.3342 | 43.62 |
| 1KOY                                                                          | 10.25 | 0.2524 | 33.87 | 6.84  | 0.3194 | 40.73 |
| 2L09                                                                          | 8.02  | 0.3188 | 39.52 | 6.68  | 0.3824 | 43.95 |
| 1RXR                                                                          | 11.96 | 0.1931 | 19.58 | 11.96 | 0.2227 | 23.49 |

|      |      |        |       |      |        |       |
|------|------|--------|-------|------|--------|-------|
| 1TIG | 6.94 | 0.5446 | 52.27 | 5.10 | 0.5446 | 52.27 |
|------|------|--------|-------|------|--------|-------|

<sup>a</sup>The number of significant digits of GDT\_TS and C<sup>α</sup>-RMSD values follows the convention of reporting these values in the CASP experiments (<https://www.predictioncenter.org>). Following this convention, TM-score values, which range from 0 to 1, are reported with 4 digits after the decimal separator.

Table S8: C $^{\alpha}$ -RMSD, TM-score, and GDT\_TS values of the first and best models of the 7 benchmark proteins from ref 1 obtained in free and cross-link-restrained of simulations.<sup>a</sup>

| ID                                                                                                    | Model 1             |          |        | Best model          |          |        |
|-------------------------------------------------------------------------------------------------------|---------------------|----------|--------|---------------------|----------|--------|
|                                                                                                       | C $^{\alpha}$ -RMSD | TM-score | GDT_TS | C $^{\alpha}$ -RMSD | TM-score | GDT_TS |
| Free simulations <sup>b</sup>                                                                         |                     |          |        |                     |          |        |
| 1A6S                                                                                                  | 10.94               | 0.1810   | 20.64  | 10.57               | 0.2332   | 25.00  |
| 1BG8                                                                                                  | 12.56               | 0.2390   | 25.99  | 10.51               | 0.2462   | 25.99  |
| 1K40                                                                                                  | 15.00               | 0.2260   | 19.25  | 13.63               | 0.2663   | 22.42  |
| 1HRE                                                                                                  | 14.31               | 0.1937   | 21.64  | 14.31               | 0.1937   | 23.88  |
| 1IYU                                                                                                  | 10.18               | 0.2301   | 25.96  | 10.18               | 0.2301   | 25.96  |
| 1UBQ                                                                                                  | 11.41               | 0.2252   | 26.32  | 9.20                | 0.3101   | 34.87  |
| 1VIG                                                                                                  | 10.40               | 0.2556   | 29.58  | 9.44                | 0.2556   | 29.58  |
| Knowledge-based C $^{\alpha}$ -restraint potentials <sup>b</sup>                                      |                     |          |        |                     |          |        |
| 1A6S                                                                                                  | 10.31               | 0.2356   | 26.74  | 9.77                | 0.2356   | 26.74  |
| 1BG8                                                                                                  | 11.61               | 0.2106   | 25.00  | 9.36                | 0.2932   | 32.24  |
| 1K40                                                                                                  | 11.17               | 0.2917   | 25.79  | 7.03                | 0.3840   | 36.31  |
| 1HRE                                                                                                  | 13.49               | 0.1927   | 23.13  | 13.15               | 0.2215   | 27.24  |
| 1IYU                                                                                                  | 11.71               | 0.2055   | 24.68  | 10.23               | 0.2451   | 25.32  |
| 1UBQ                                                                                                  | 13.14               | 0.1970   | 24.01  | 10.18               | 0.2724   | 30.59  |
| 1VIG                                                                                                  | 9.62                | 0.2171   | 26.76  | 7.17                | 0.3085   | 39.08  |
| MD-based restraint potentials <sup>b</sup>                                                            |                     |          |        |                     |          |        |
| 1A6S                                                                                                  | 8.77                | 0.2778   | 29.02  | 8.77                | 0.2874   | 29.02  |
| 1BG8                                                                                                  | 11.24               | 0.2035   | 23.03  | 9.03                | 0.2279   | 26.64  |
| 1K40                                                                                                  | 8.99                | 0.3491   | 29.56  | 8.99                | 0.3491   | 29.56  |
| 1HRE                                                                                                  | 13.71               | 0.1769   | 20.90  | 11.59               | 0.2062   | 24.63  |
| 1IYU                                                                                                  | 12.05               | 0.1926   | 23.40  | 10.77               | 0.2538   | 25.96  |
| 1UBQ                                                                                                  | 9.56                | 0.2723   | 31.25  | 9.54                | 0.2909   | 33.88  |
| 1VIG                                                                                                  | 10.11               | 0.2869   | 34.86  | 8.06                | 0.2869   | 35.92  |
| Lorentz-like potential, $d_u = 12 \text{ \AA}$ , $\sigma = 5 \text{ \AA}$ , $A = 8 \text{ kcal/mol}$  |                     |          |        |                     |          |        |
| 1A6S                                                                                                  | 9.68                | 0.3176   | 31.61  | 7.40                | 0.3176   | 33.05  |
| 1BG8                                                                                                  | 10.84               | 0.2160   | 25.00  | 10.18               | 0.2681   | 30.26  |
| 1K40                                                                                                  | 12.34               | 0.2502   | 21.43  | 11.74               | 0.3751   | 31.94  |
| 1HRE                                                                                                  | 12.34               | 0.2027   | 23.13  | 13.09               | 0.2167   | 28.73  |
| 1IYU                                                                                                  | 12.88               | 0.2065   | 23.42  | 11.96               | 0.2108   | 23.42  |
| 1UBQ                                                                                                  | 10.67               | 0.2938   | 34.87  | 6.81                | 0.4171   | 44.74  |
| 1VIG                                                                                                  | 11.00               | 0.2309   | 27.11  | 9.02                | 0.2434   | 30.63  |
| Lorentz-like potential, $d_u = 12 \text{ \AA}$ , $\sigma = 15 \text{ \AA}$ , $A = 8 \text{ kcal/mol}$ |                     |          |        |                     |          |        |
| 1A6S                                                                                                  | 10.14               | 0.2709   | 30.17  | 8.66                | 0.3331   | 35.63  |

|                                                                                                        |       |        |       |       |        |       |
|--------------------------------------------------------------------------------------------------------|-------|--------|-------|-------|--------|-------|
| 1BG8                                                                                                   | 12.14 | 0.2171 | 24.01 | 10.31 | 0.2646 | 31.58 |
| 1K40                                                                                                   | 11.42 | 0.3088 | 26.98 | 10.96 | 0.3819 | 32.34 |
| 1HRE                                                                                                   | 13.72 | 0.1964 | 23.88 | 13.21 | 0.2017 | 23.88 |
| 1IYU                                                                                                   | 10.33 | 0.2423 | 26.27 | 10.33 | 0.2791 | 29.11 |
| 1UBQ                                                                                                   | 11.41 | 0.2528 | 30.26 | 10.66 | 0.2936 | 32.24 |
| 1VIG                                                                                                   | 9.49  | 0.3004 | 36.62 | 9.41  | 0.3004 | 36.62 |
| Lorentz-like potential, $d_u = 12 \text{ \AA}$ , $\sigma = 5 \text{ \AA}$ , $A = 20 \text{ kcal/mol}$  |       |        |       |       |        |       |
| 1A6S                                                                                                   | 9.20  | 0.3024 | 32.18 | 9.20  | 0.3024 | 32.18 |
| 1BG8                                                                                                   | 11.43 | 0.2432 | 28.62 | 10.61 | 0.2510 | 29.61 |
| 1K40                                                                                                   | 10.67 | 0.3456 | 29.17 | 10.67 | 0.3456 | 29.17 |
| 1HRE                                                                                                   | 16.18 | 0.1754 | 21.27 | 11.92 | 0.2097 | 24.63 |
| 1IYU                                                                                                   | 11.47 | 0.2496 | 28.80 | 8.97  | 0.2591 | 29.43 |
| 1UBQ                                                                                                   | 11.11 | 0.3115 | 33.88 | 10.27 | 0.3265 | 35.20 |
| 1VIG                                                                                                   | 9.92  | 0.2421 | 26.06 | 9.74  | 0.2411 | 28.17 |
| Lorentz-like potential, $d_u = 12 \text{ \AA}$ , $\sigma = 15 \text{ \AA}$ , $A = 20 \text{ kcal/mol}$ |       |        |       |       |        |       |
| 1A6S                                                                                                   | 10.20 | 0.2673 | 28.45 | 9.38  | 0.269  | 28.45 |
| 1BG8                                                                                                   | 9.37  | 0.3012 | 32.57 | 9.37  | 0.3012 | 32.57 |
| 1K40                                                                                                   | 3.92  | 0.6234 | 52.98 | 3.92  | 0.6234 | 52.98 |
| 1HRE                                                                                                   | 13.92 | 0.2050 | 22.39 | 12.58 | 0.2714 | 30.60 |
| 1IYU                                                                                                   | 10.78 | 0.2638 | 26.27 | 10.78 | 0.2638 | 28.80 |
| 1UBQ                                                                                                   | 8.92  | 0.3685 | 39.80 | 8.92  | 0.3685 | 39.80 |
| 1VIG                                                                                                   | 9.04  | 0.2578 | 28.52 | 8.80  | 0.2578 | 30.63 |

<sup>a</sup>The number of significant digits of GDT\_TS and C <sup>$\alpha$</sup> -RMSD values follows the convention of reporting these values in the CASP experiments (<https://www.predictioncenter.org>). Following this convention, TM-score values, which range from 0 to 1, are reported with 4 digits after the decimal separator.

<sup>b</sup>Data from ref 1.

Table S9: C<sup>α</sup>-RMSD, TM-score, and GDT\_TS values of the first and best models of the first (1AO6-1), second (1AO6-2), third (1AO6-3), and sixth (1AO6-6) repeat of human serum albumin and myoglobin (2V1H) benchmark systems, for which experimental cross-link data were used.<sup>a</sup>

| ID                                                                                     | Model 1              |          |        | Best model           |          |        |
|----------------------------------------------------------------------------------------|----------------------|----------|--------|----------------------|----------|--------|
|                                                                                        | C <sup>α</sup> -RMSD | TM-score | GDT_TS | C <sup>α</sup> -RMSD | TM-score | GDT_TS |
| Dihedral-angle and disulfide-bridge restraints (for 1AO6-1 – 1AO6-6 only) <sup>b</sup> |                      |          |        |                      |          |        |
| 1AO6-1                                                                                 | 10.57                | 0.4420   | 41.83  | 7.47                 | 0.4492   | 42.33  |
|                                                                                        | 6.75                 | 0.4830   | 45.54  | 5.65                 | 0.5324   | 50.50  |
| 1AO6-2                                                                                 | 9.90                 | 0.4555   | 42.16  | 7.91                 | 0.4555   | 42.16  |
|                                                                                        | 10.62                | 0.4949   | 47.79  | 5.65                 | 0.5219   | 50.74  |
| 1AO6-3                                                                                 | 8.98                 | 0.5030   | 48.61  | 8.10                 | 0.5266   | 51.94  |
|                                                                                        | 5.00                 | 0.4850   | 48.89  | 5.00                 | 0.5169   | 50.83  |
| 1AO6-6                                                                                 | 16.27                | 0.3307   | 36.01  | 12.57                | 0.3670   | 39.29  |
|                                                                                        | 12.25                | 0.3525   | 38.99  | 10.62                | 0.3720   | 42.26  |
| 2V1H                                                                                   | 9.23                 | 0.3878   | 30.39  | 9.23                 | 0.3878   | 30.39  |
| Lorentz-like restraints, $\sigma = 5 \text{ \AA}$ , $A = 8 \text{ kcal/mol}$           |                      |          |        |                      |          |        |
| 1AO6-1                                                                                 | 6.27                 | 0.4212   | 43.56  | 5.12                 | 0.4897   | 48.27  |
| 1AO6-2                                                                                 | 6.72                 | 0.6041   | 55.64  | 5.99                 | 0.6041   | 55.64  |
| 1AO6-3                                                                                 | 4.76                 | 0.4643   | 48.33  | 4.76                 | 0.5338   | 52.22  |
| 1AO6-6                                                                                 | 12.84                | 0.4247   | 46.13  | 10.05                | 0.4247   | 46.13  |
| 2V1H                                                                                   | 4.29                 | 0.6130   | 46.57  | 4.29                 | 0.6130   | 46.57  |
| Lorentz-like restraints, $\sigma = 5 \text{ \AA}$ , $A = 20 \text{ kcal/mol}$          |                      |          |        |                      |          |        |
| 1AO6-1                                                                                 | 4.70                 | 0.5574   | 51.49  | 4.70                 | 0.5574   | 51.49  |
| 1AO6-2                                                                                 | 7.22                 | 0.5636   | 54.90  | 6.10                 | 0.5636   | 54.90  |
| 1AO6-3                                                                                 | 5.58                 | 0.4282   | 43.33  | 5.17                 | 0.4988   | 50.28  |
| 1AO6-6                                                                                 | 12.26                | 0.4907   | 50.00  | 12.12                | 0.4907   | 50.00  |
| 2V1H                                                                                   | 7.50                 | 0.4317   | 32.68  | 6.94                 | 0.5065   | 37.91  |
| Lorentz-like restraints, $\sigma = 15 \text{ \AA}$ , $A = 8 \text{ kcal/mol}$          |                      |          |        |                      |          |        |
| 1AO6-1                                                                                 | 6.88                 | 0.3991   | 40.35  | 5.36                 | 0.4979   | 47.77  |
| 1AO6-2                                                                                 | 6.90                 | 0.5835   | 54.90  | 6.20                 | 0.6457   | 58.58  |
| 1AO6-3                                                                                 | 8.63                 | 0.4479   | 46.39  | 5.37                 | 0.5372   | 53.61  |
| 1AO6-6                                                                                 | 12.23                | 0.3881   | 43.45  | 7.53                 | 0.3986   | 43.45  |
| 2V1H                                                                                   | 3.90                 | 0.6601   | 55.07  | 3.89                 | 0.6601   | 55.07  |
| Lorentz-like restraints, $\sigma = 15 \text{ \AA}$ , $A = 20 \text{ kcal/mol}$         |                      |          |        |                      |          |        |
| 1AO6-1                                                                                 | 5.69                 | 0.4104   | 43.07  | 5.69                 | 0.4781   | 45.30  |
| 1AO6-2                                                                                 | 6.59                 | 0.4993   | 47.06  | 5.96                 | 0.6032   | 54.90  |
| 1AO6-3                                                                                 | 7.50                 | 0.3845   | 38.89  | 4.55                 | 0.5730   | 56.11  |

|                                    |       |        |       |       |        |       |
|------------------------------------|-------|--------|-------|-------|--------|-------|
| 1AO6-6                             | 12.34 | 0.4146 | 44.05 | 10.53 | 0.4146 | 44.05 |
| 2V1H                               | 3.92  | 0.6502 | 53.27 | 3.92  | 0.6502 | 53.27 |
| MD-derived potentials <sup>c</sup> |       |        |       |       |        |       |
| 1AO6-1                             | 5.55  | 0.4618 | 46.78 | 5.55  | 0.4898 | 50.99 |
| 1AO6-2                             | 10.95 | 0.4603 | 43.38 | 6.15  | 0.5116 | 48.53 |
| 1AO6-3                             | 5.82  | 0.4418 | 44.17 | 5.25  | 0.4481 | 46.11 |
| 1AO6-6                             | 12.35 | 0.3470 | 40.18 | 8.29  | 0.4284 | 44.05 |

<sup>a</sup>The number of significant digits of GDT\_TS and C<sup>α</sup>-RMSD values follows the convention of reporting these values in the CASP experiments (<https://www.predictioncenter.org>). Following this convention, TM-score values, which range from 0 to 1, are reported with 4 digits after the decimal separator.

<sup>b</sup>Upper line for 1AO6-1, 1AO6-2, 1AO6-3, and 1AO6-6: dihedral-angle restraints only; lower lines: dihedral-angle and disulfide-bridge restraints.

<sup>c</sup>MD-derived potentials are not available for most of the cross-links reported for myoglobin (2V1H); therefore the respective calculations were not performed.

## References

- (1) Kogut, M.; Gong, Z.; Tang, C.; Liwo, A., Pseudopotentials for Coarse-Grained Cross-Link-Assisted Modeling of Protein Structures. *J. Comput. Chem.* **2021**, *42*, 2054–2067.
- (2) Belsom, A.; Schneider, M.; Fischer, L.; Brock, O.; Rappsilber, J., Serum Albumin Domain Structures in Human Blood Serum by Mass Spectrometry and Computational Biology. *Mol. Cell. Proteomics* **2016**, *15*, 1105–1116.
- (3) Brodie, N. I.; Popov, K. I.; Petrotchenko, E. V.; Dokholyan, N. V.; Borchers, C. H., Solving Protein Structures Using Short-Distance Cross-Linking Constraints as a Guide for Discrete Molecular Dynamics Simulations. *Sci. Adv.* **2017**, *3*, e1700479.
